# Supplementary material for: The structured core of human β tubulin confers isotype-specific polymerization properties
Source: PubMed Central journal article supplement — J Cell Biol. 2016 May 23;213(4):425–33. doi: 10.1083/jcb.201603050 (PMC4878094; doi:10.1083/jcb.201603050), 2016-05-23
Supplement: JCB_201603050_sm.pdf [file JCB_201603050_sm.pdf]

Pamula et al., <http://www.jcb.org/cgi/content/full/jcb.201603050/DC1>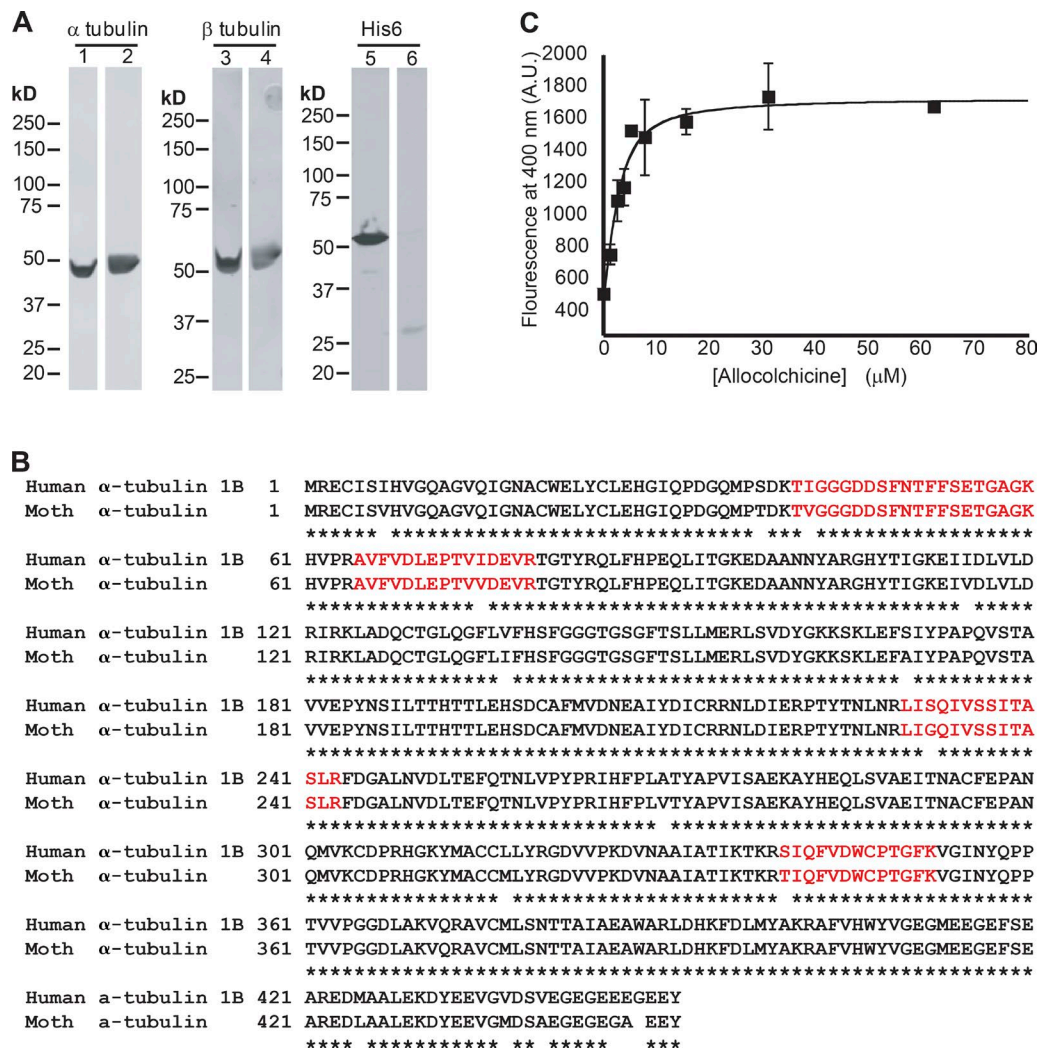

Figure S1. **Purification of recombinant  $\alpha$ / $\beta$ IIIB tubulin heterodimers.** (A) Full blots corresponding to those shown in Fig. 1 C, showing western blot analyses of proteins eluted from nickel-affinity (lanes 1, 3, and 5) and TOG-affinity (lanes 2, 4, and 6) chromatography. Antibodies against  $\alpha$  tubulin,  $\beta$  tubulin, and C-terminal hexahistidine tag are indicated. (B) Alignment of protein sequences from human  $\alpha$  tubulin 1B (NP\_006073.2) and  $\alpha$  tubulin from insect cells (ABU94679.1). Peptide fragments that were used to estimate the relative amounts of human and insect  $\alpha$  tubulin are labeled in red. (C) Equilibrium binding curve for  $\alpha$ / $\beta$ IIIB with allocolchicine. The data from three independent experiments were averaged and fitted to a curve, weighed by the SD.  $K_d = 1.8 \pm 0.42 \mu\text{M}$  ( $n = 3$ , mean  $\pm$  SD). A.U., arbitrary units.

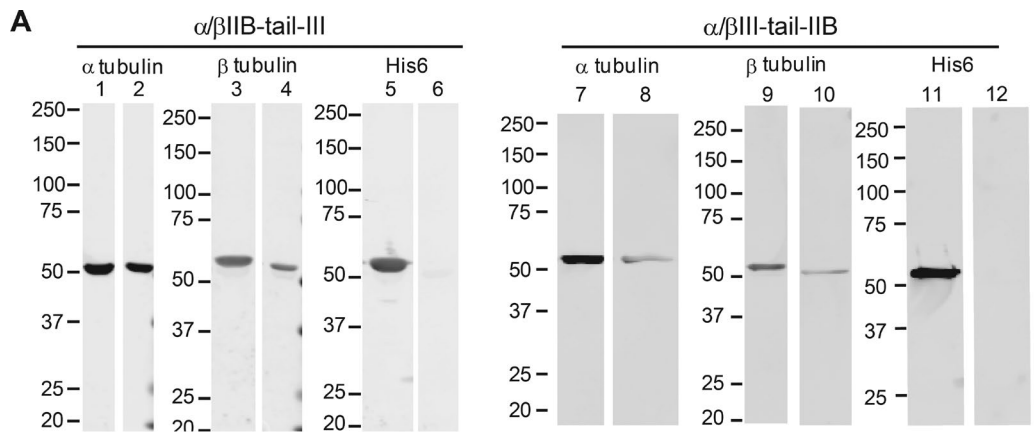

**B**  
Percent Identity Matrix - created by Clustal2.1

|                |             | $\beta$ VI | $\beta$ V | $\beta$ III | $\beta$ IVA | $\beta$ IIA | $\beta$ IIB | $\beta$ IVB | $\beta$ I |
|----------------|-------------|------------|-----------|-------------|-------------|-------------|-------------|-------------|-----------|
| 1: $\beta$ VI  | NM_030773.3 | 100.00     | 78.03     | 77.33       | 78.60       | 78.43       | 78.65       | 78.43       | 78.60     |
| 2: $\beta$ V   | NM_032525.2 | 78.03      | 100.00    | 92.38       | 91.89       | 90.34       | 90.56       | 90.79       | 90.77     |
| 3: $\beta$ III | NM_006086.3 | 77.33      | 92.38     | 100.00      | 91.67       | 91.46       | 91.69       | 92.81       | 92.57     |
| 4: $\beta$ IVA | NM_006087.3 | 78.60      | 91.89     | 91.67       | 100.00      | 94.59       | 95.05       | 97.97       | 96.61     |
| 5: $\beta$ IIA | NM_001069.2 | 78.43      | 90.34     | 91.46       | 94.59       | 100.00      | 99.55       | 96.40       | 95.05     |
| 6: $\beta$ IIB | NM_178012.4 | 78.65      | 90.56     | 91.69       | 95.05       | 99.55       | 100.00      | 96.85       | 95.50     |
| 7: $\beta$ IVB | NM_006088.5 | 78.43      | 90.79     | 92.81       | 97.97       | 96.40       | 96.85       | 100.00      | 97.52     |
| 8: $\beta$ I   | NM_178014.3 | 78.60      | 90.77     | 92.57       | 96.61       | 95.05       | 95.50       | 97.52       | 100.00    |

Figure S2. **Purification of chimeric  $\beta$  tubulin heterodimers and tubulin isotype identity matrix.** (A) Full blots corresponding to those shown in Fig. 4 D showing western blot analyses of proteins eluted from nickel-affinity (lanes 1, 3, 5, 7, 9, and 11) and TOG-affinity (lanes 2, 4, 6, 8, 10, and 12) chromatography. (B) Percent identity matrix for human  $\beta$  tubulin isotypes.

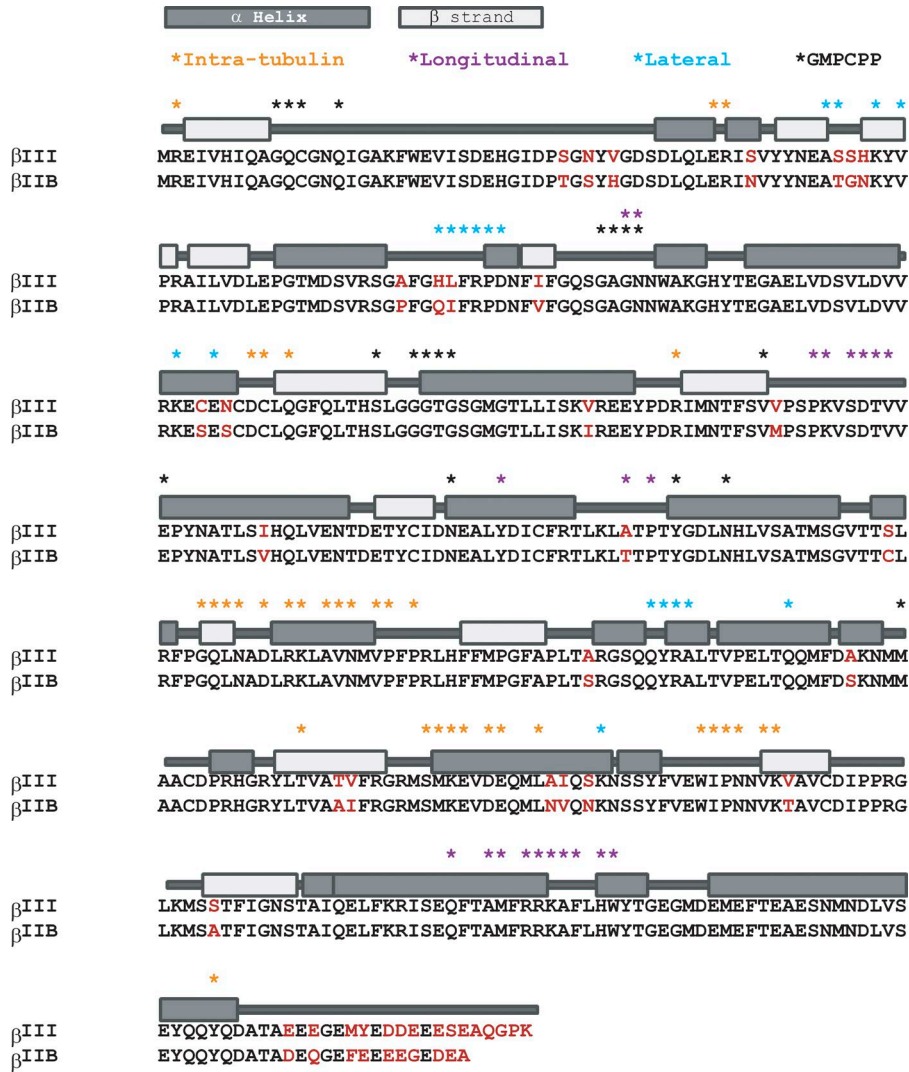

Figure S3.  $\beta$  tubulin isotypes IIB and III alignment and a secondary structure topology map. Alignment of  $\beta$ III and  $\beta$ IIB amino acid sequence. Secondary structure topology map corresponds to features derived from PDB listing 3J6E. Residues on  $\beta$  tubulin within 3 Å of intra-tubulin (orange stars), longitudinal (purple stars), or lateral (blue stars) contacts or the GMPCPP binding site (black stars) are indicated. Residues that differ between isotypes  $\beta$ III and  $\beta$ IIB are labeled in red.
